# Supplementary material for: Zebrafish, a Novel Model System to Study Uremic Toxins: The Case for the Sulfur Amino Acid Lanthionine
Source: PubMed Central journal article supplement (PMC5983689; doi:10.3390/ijms19051323), 2018-04-29
Supplement: ijms-19-01323-s001.pdf [file ijms-19-01323-s001.pdf]

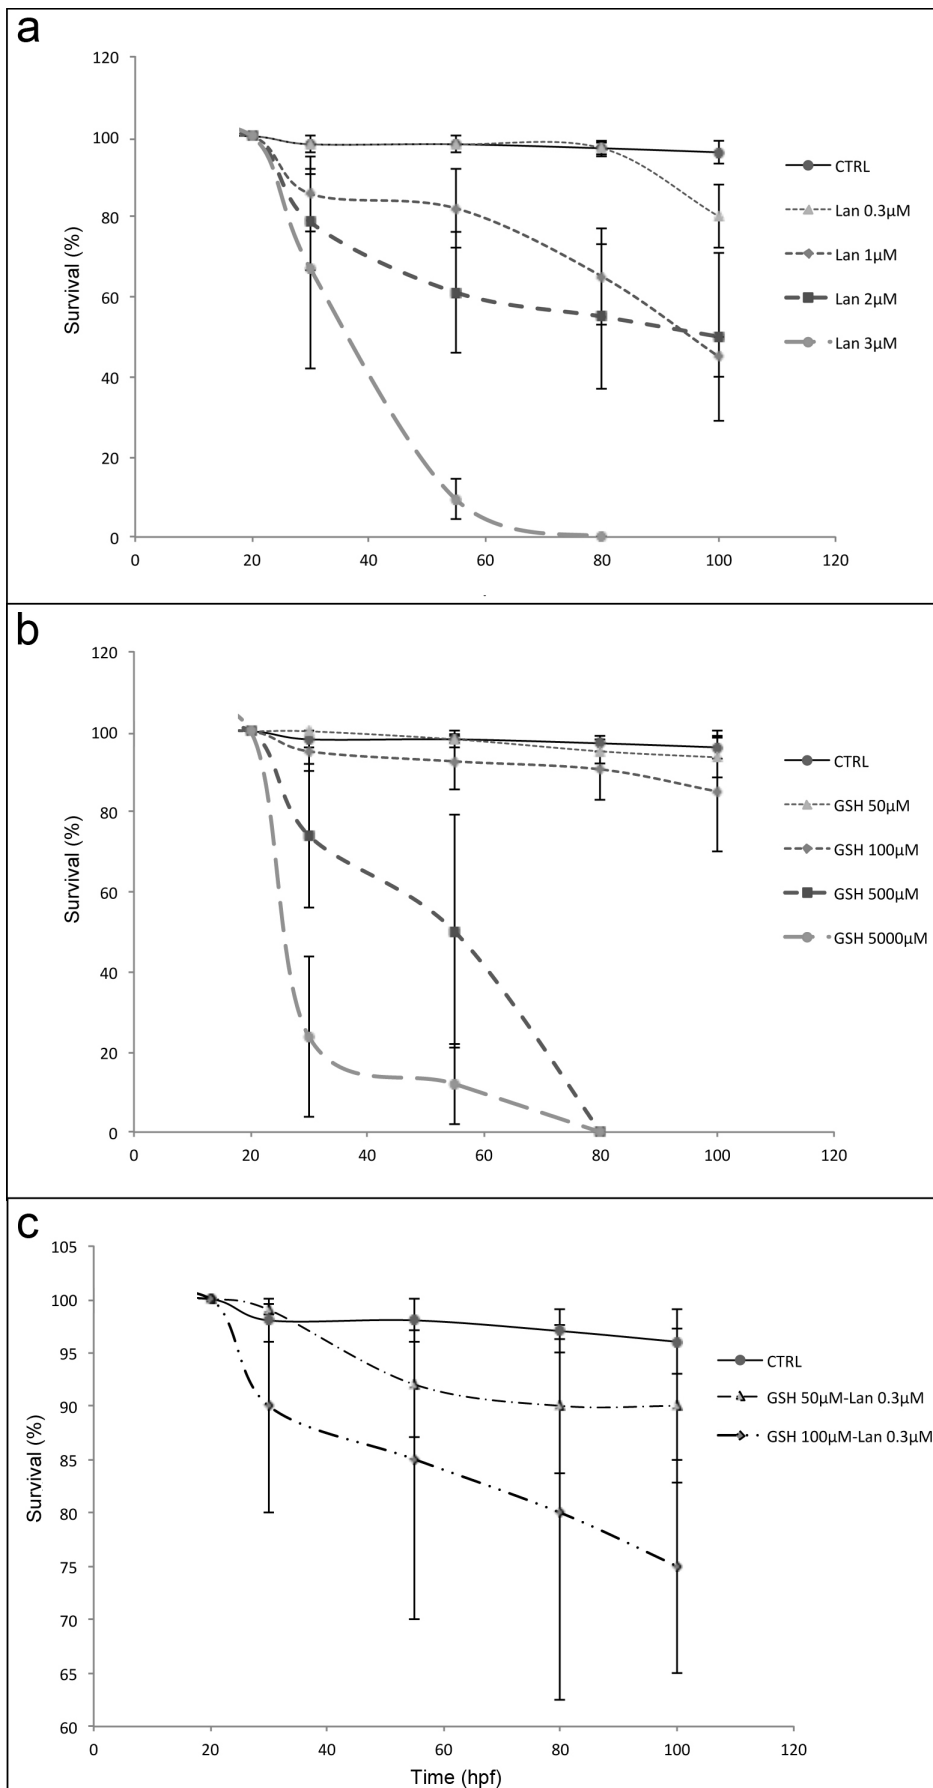

**Figure S1. Survival rates of zebrafish embryos treated with lanthionine and/or GSH.** Kinetics of survival rates of zebrafish embryos treated with lanthionine and GSH alone or in combination. Treatments started at 18 hpf; monitoring was accomplished, at the indicated times, within the 30-100 hpf interval. Results are reported in percentage of surviving animals at each time, compared to the initial number, within each observation group. (a) lanthionine at various concentrations; (b) GSH at various concentrations; (c) lanthionine in combination with GSH at various concentrations. Lan, lanthionine; CTRL, control (no treatment); hpf, hours post fertilization.

**Table S1.** Functional involvement of the proteins affected by lanthionine and GSH administration in zebrafish. Pathway nomenclature consists of a molecular network in terms of the KEGG (Kyoto Encyclopedia of Genes and Genomes) Orthology groups (<http://www.genome.jp/kegg/pathway.html>). In order to draw functional inferences about the individual proteins or on potential interactions among proteins, overall pathways were identified as generated according to the KEGG pathway map. Protein function and "Disease Ontology" is taken from zebrafish database Zfin (The Zebrafish Information Network; <https://zfin.org/>).

| PROTEIN                                         | PATHWAY KEGG                                                                                                                                                                                                                                    | FUNCTION                                                                                                                                                                                                                                                                           | DISEASE ONTOLOGY                                                                                                                                        |
|-------------------------------------------------|-------------------------------------------------------------------------------------------------------------------------------------------------------------------------------------------------------------------------------------------------|------------------------------------------------------------------------------------------------------------------------------------------------------------------------------------------------------------------------------------------------------------------------------------|---------------------------------------------------------------------------------------------------------------------------------------------------------|
| <b>CBS<br/>(CBSa AND<br/>CBSb<br/>PARALOGS)</b> | Cysteine and methionine metabolism<br>Biosynthesis of amino acids<br>Glycine, serine and threonine metabolism<br>Metabolic pathways                                                                                                             | Cellular amino acid biosynthetic process<br>Cystathionine beta-synthase activity<br>Cysteine biosynthetic process<br>Cysteine biosynthetic process from serine<br>Cysteine biosynthetic process via cystathionine<br>Heme binding<br>Lyase activity<br>Pyridoxal phosphate binding | Homocystinuria                                                                                                                                          |
| <b>CSE</b>                                      | Oocyte meiosis<br>Selenocompound metabolism<br>Cysteine and methionine metabolism<br>Biosynthesis of amino acids<br>Glycine, serine and threonine metabolism<br>Metabolic pathways                                                              | 'De novo' L-methionine biosynthetic process<br>Catalytic activity<br>Cystathionine gamma-lyase activity<br>Cysteine biosynthetic process via cystathionine<br>Lyase activity<br>Pyridoxal phosphate binding<br>Transsulfuration                                                    | Cystathioninuria                                                                                                                                        |
| <b>Myh6</b>                                     | Tight junction                                                                                                                                                                                                                                  | Actin filament binding<br>ATP binding<br>Atrial cardiac myofibril assembly<br>Cardiac atrium development<br>Heart contraction<br>Heart morphogenesis<br>Motor activity<br>Myosin complex<br>Nucleotide binding                                                                     | Atrial heart septal defect 3<br>Dilated cardiomyopathy 1EE<br>Hypertrophic cardiomyopathy 14                                                            |
| <b>MHC</b>                                      | Vascular smooth muscle contraction<br>Adrenergic signaling in cardiomyocytes<br>Cellular senescence<br>Endocytosis<br>Cardiac muscle contraction<br>Cell adhesion molecules (CAMs)<br>Intestinal immune network for IgA production<br>Phagosome | Cardiac, skeletal and jaw muscle differentiation<br>Myosin-dependent functions<br>Myosin motor domain                                                                                                                                                                              | Dilated cardiomyopathy 1S<br>Left ventricular noncompaction 5<br>Distal muscular dystrophy<br>Hypertrophic cardiomyopathy 1<br>Scapuloperoneal myopathy |
| <b>COL-1A1</b>                                  | ECM-receptor interaction<br>AGE-RAGE signaling pathway in diabetic complications<br>Focal adhesion                                                                                                                                              | Collagen trimer formation and cytoplasm formation<br>Extracellular matrix structural constituent<br>Response to mechanical stimulus<br>Fin development, morphogenesis and regeneration<br>Pectoral fin development<br>Regulation of ossification                                   | Osteogenesis imperfecta type1-4<br>Osteoporosis<br>Type I Ehlers-Danlos syndrome                                                                        |

**Table S2.** KEGG pathways in *D. rerio* involving miRNA-125b, miRNA-200b and miRNA-223. Target genes for miRNA-125b, miRNA-200b and miRNA-223 were predicted using Target Scan Fish Release 6.2 (<http://www.targetscan.org/>). Pathways involving gene targets for miRNA-125b, miRNA-200b and miRNA-223 as according to miRSystem software (ver. 20160513-miRNAsystem.cgm.ntu.edu.tw). In order to draw inferences on potential functional interactions between miRNA and their gene targets, pathways identified are listed according to the KEGG (Kyoto Encyclopedia of Genes and Genomes) pathway map. Relevant nomenclature consists of a molecular network in terms of the KEGG Orthology (KO) groups. miRNA genes targets analysis includes genes selected according to the relevance to processes involved renal failure diseases.

|                                                                  | <b>PATHWAY</b>                               | <b>miR-125b</b>                                              | <b>miR-200b</b>                                                                                                                                      | <b>miR-223</b>                                                                    |
|------------------------------------------------------------------|----------------------------------------------|--------------------------------------------------------------|------------------------------------------------------------------------------------------------------------------------------------------------------|-----------------------------------------------------------------------------------|
| ECM FORMATION<br>AND CELL<br>JUNCTION                            | <b>ECM-RECEPTOR INTERACTION</b>              | <i>THBS1, ITGA9</i>                                          | <i>DAG1, COL4A1, COL4A2, COL4A6, FN1, ITGA9, ITGB8, LAMC1</i>                                                                                        | <i>DAG1, COL1A2, COL4A1</i>                                                       |
|                                                                  | <b>CELL ADHESION MOLECULES (CAMS)</b>        | <i>CNTNAP2, ITGA9</i>                                        | <i>CNTNAP2, SDC2, ITGA9, ITGB8</i>                                                                                                                   | <i>CNTNAP2, SDC2</i>                                                              |
|                                                                  | <b>ADHERENS JUNCTION</b>                     |                                                              | <i>MAPK1, CTNNA2, RAC1</i>                                                                                                                           | <i>IGF1, MAPK1, SMAD4</i>                                                         |
|                                                                  | <b>GAP JUNCTION</b>                          | <i>PRKG1, MAP3K2</i>                                         | <i>ADRB1, MAPK1, PRKG1, ADCY7, ITPR2, MAP2K1, MAPK7, PDGFB, PRKCA</i>                                                                                | <i>ADRB1, KRAS, MAP2K5, MAPK1, PRKG1, ADCY7</i>                                   |
|                                                                  | <b>TIGHT JUNCTION</b>                        | <i>MAP2K7</i>                                                | <i>MAPK1, MAPK10, MAP3K1, MAPK9, RAC1, PRKAG2, MAP2K7</i>                                                                                            | <i>MAPK1, PPP2CA, PRKCI, MAPK10, MAP3K1</i>                                       |
|                                                                  | <b>FOCAL ADHESION</b>                        | <i>PIK3R3, THBS1, ITGA9</i>                                  | <i>COL4A1, MAPK1, PIK3R3, MAPK10, PAK7, COL4A2, COL4A6, FN1, ITGA9, ITGB8, LAMC1, MAP2K1, MAPK9, PDGFB, PRKCA, RAC1, RAP1B, BCL2</i>                 | <i>COL1A2, COL4A1, IGF1, MAPK1, VEGFAB, PIK3R3, MAPK10, PAK7</i>                  |
|                                                                  | <b>REGULATION OF ACTIN CYTOSKELETON</b>      | <i>PIK3R3, FGFR2, ITGA9</i>                                  | <i>MAPK1, PIK3R3, PAK7, FGFR2, FN1, ITGA9, ITGB8, MAP2K1, PDGFB, RAC1</i>                                                                            | <i>KRAS, MAPK1, PIK3R3, PAK7</i>                                                  |
| METABOLISM                                                       | <b>GLUTATHIONE METABOLISM</b>                | <i>TXNDC12</i>                                               | <i>RRM2</i>                                                                                                                                          |                                                                                   |
|                                                                  | <b>CYSTEINE AND METHIONINE METABOLISM</b>    |                                                              | <i>ENOPH1</i>                                                                                                                                        | <i>ENOPH1</i>                                                                     |
|                                                                  | <b>ADIPOCYTOKINE SIGNALING PATHWAY</b>       | <i>IRS1</i>                                                  | <i>MAPK1, TNFRSF1B, MAPK10, MAPK9, IRS1, PRKAG2, IKBKB, PRKCQ</i>                                                                                    | <i>MAPK1, TNFRSF1B, MAPK10</i>                                                    |
|                                                                  | <b>CHOLESTEROL METABOLISM</b>                | <i>LDLR</i>                                                  | <i>RAP1B</i>                                                                                                                                         | <i>LDLR</i>                                                                       |
|                                                                  | <b>METABOLIC PATHWAYS</b>                    | <i>PLCG1</i>                                                 | <i>ENOPH1, IPPK, PLCG1, RRM2, PI4KB</i>                                                                                                              | <i>ENOPH1, IPPK, PI4K2A</i>                                                       |
| FUNDAMENTAL<br>REGULATORY/<br>SIGNAL<br>TRANSDUCTION<br>PATHWAYS | <b>MAPK SIGNALING PATHWAY</b>                | <i>CACNA1C, MAP3K3, FGFR2, TP53, MAP2K7, MAP3K2, RPS6KA4</i> | <i>MAPK1, MAPK10, CACNA1C, CACNB1, MAP3K1, MAP3K3, FGFR2, MAP2K1, MAPK7, MAPK9, PDGFB, PRKCA, RAC1, RAP1B, TP53, IKBKB, MAP2K7, RPS6KA4, RPS6KA5</i> | <i>IGF1, KRAS, MAP2K5, MAPK1, VEGFAB, MAPK10, CACNA1C, CACNB1, MAP3K1, MAP3K3</i> |
|                                                                  | <b>UBIQUITIN MEDIATED PROTEOLYSIS</b>        | <i>UBE2R2, SMURF2</i>                                        | <i>MAP3K1, UBE2J1, UBE2R2, SMURF2, SMURF1</i>                                                                                                        | <i>MAP3K1, UBE2J1, UBE2R2, UBE4A</i>                                              |
|                                                                  | <b>NOTCH SIGNALING PATHWAY</b>               | <i>NOTCH3</i>                                                | <i>KAT2B</i>                                                                                                                                         | <i>NOTCH3</i>                                                                     |
|                                                                  | <b>WNT SIGNALING PATHWAY</b>                 | <i>TP53</i>                                                  | <i>MAPK1, MAPK10, MAPK9, PRKCA, RAC1, TP53</i>                                                                                                       | <i>MAPK1, SMAD4, MAPK10</i>                                                       |
|                                                                  | <b>MTOR SIGNALING PATHWAY</b>                | <i>PIK3R3, IRS1</i>                                          | <i>MAPK1, PIK3R3, MAP2K1, PRKCA, IRS1, IKBKB</i>                                                                                                     | <i>IGF1, KRAS, MAPK1, PIK3R3</i>                                                  |
|                                                                  | <b>PHOSPHATIDYLINOSITOL SIGNALING SYSTEM</b> | <i>PIK3R3, PLCG1</i>                                         | <i>PIK3R3, IPPK, ITPR2, PRKCA, PLCG1, PI4KB</i>                                                                                                      | <i>PIK3R3, IPPK, PI4K2A</i>                                                       |
|                                                                  | <b>INOSITOL PHOSPHATE METABOLISM, PI4KB</b>  | <i>PLCG1</i>                                                 | <i>IPPK, PLCG1</i>                                                                                                                                   | <i>IPPK, PI4K2A</i>                                                               |
|                                                                  | <b>FOXO SIGNALING PATHWAY</b>                | <i>PIK3R3, IRS1</i>                                          | <i>MAPK1, PIK3R3, MAPK10, MAP2K1, MAPK9, BCL2, CDKN1B, IRS1, PRKAG2, IKBKB, IL10</i>                                                                 | <i>IGF1, KRAS, MAPK1, SMAD4, PIK3R3, MAPK10</i>                                   |

|                                          |                                                             |                                        |                                                                                                          |                                                                   |
|------------------------------------------|-------------------------------------------------------------|----------------------------------------|----------------------------------------------------------------------------------------------------------|-------------------------------------------------------------------|
|                                          | <b>GNRH SIGNALING PATHWAY</b>                               | <i>CACNA1C, MAP3K3, MAP2K7, MAP3K2</i> | <i>MAPK1, MAPK10, ADCY7, CACNA1C, MAP3K1, MAP3K3, ITPR2, MAP2K1, MAP2K1, MAPK7, MAPK9, PRKCA, MAP2K7</i> | <i>KRAS, MAPK1, MAPK10, ADCY7, CACNA1C, MAP3K1, MAP3K3</i>        |
|                                          | <b>CALCIUM SIGNALING PATHWAY</b>                            | <i>CACNA1C, PLCG1</i>                  | <i>ADRB1, ADCY7, CACNA1C, ITPR2, PRKCA, PLCG1, ATP2B2</i>                                                | <i>ADRB1, ADCY7, CACNA1C</i>                                      |
|                                          | <b>CARDIAC MUSCLE CONTRACTION</b>                           | <i>CACNA1C</i>                         | <i>ATP1B4, CACNA1C, CACNB1</i>                                                                           | <i>ATP1B4, CACNA1C, CACNB1</i>                                    |
|                                          | <b>VASCULAR SMOOTH MUSCLE CONTRACTION</b>                   |                                        | <i>MAPK1, PRKG1, PERP, ADCY7, ITPR2, MAP2K1, PRKCA, PRKCQ</i>                                            | <i>MAPK1, PRKG1, PERP, ADCY7</i>                                  |
|                                          | <b>HYPERTROPHIC CARDIOMYOPATHY (HCM)</b>                    | <i>CACNA1C</i>                         | <i>DAG1, CACNA1C</i>                                                                                     | <i>DAG1, CACNA1C</i>                                              |
|                                          | <b>VEGF SIGNALING PATHWAY</b>                               | <i>PIK3R3, PLCG1</i>                   | <i>MAPK1, PIK3R3, MAP2K1, PRKCA, RAC1, PLCG1</i>                                                         | <i>KRAS, MAPK1, VEGFAB, PIK3R3</i>                                |
| <b>RENAL AND CARDIOVASCULAR FUNCTION</b> | <b>ADRENERGIC SIGNALING IN CARDIOMYOCYTES</b>               | <i>CACNA1C</i>                         | <i>ADRB1, MAPK1, PPP2CA, ATP1B4, ADCY7, CACNA1C, CACNB1, PRKCA, BCL2, ATP2B2, RPS6KA5</i>                | <i>ADRB1, MAPK1, PPP2CA, ATP1B4, ADCY7, CACNA1C, CACNB1</i>       |
|                                          | <b>APELIN SIGNALING PATHWAY</b>                             | <i>NOTCH3</i>                          | <i>MAPK1, ADCY7, ITPR2, PRKAG2</i>                                                                       | <i>KRAS, MAPK1, SMAD4, ADCY7, NOTCH3</i>                          |
|                                          | <b>AGE-RAGE SIGNALING PATHWAY IN DIABETIC COMPLICATIONS</b> | <i>PIK3R3, PLCG1, EDN1</i>             | <i>COL4A1, MAPK1, PIK3R3, MAPK10, COL4A2, COL4A6, FN1, MAPK9, PRKCA, RAC1, BCL2, CDKN1B, PLCG1</i>       | <i>COL1A2, COL4A1, KRAS, MAPK1, SMAD4, VEGFAB, PIK3R3, MAPK10</i> |
|                                          | <b>INSULIN SIGNALING PATHWAY</b>                            | <i>IRS1</i>                            | <i>MAPK1, MAP2K1, MAPK9, IRS1, PRKAG2, PRKAR2B, IKBKB</i>                                                | <i>MAPK1</i>                                                      |
| <b>CANCER</b>                            | <b>P53 SIGNALING PATHWAY</b>                                | <i>THBS1, CDK6, TP53</i>               | <i>E2F1, IGFBP3, CCNE2, CDK6, TP53, RRM2</i>                                                             | <i>IGF1, E2F1, IGFBP3, PERP</i>                                   |
|                                          | <b>CYTOKINE-CYTOKINE RECEPTOR INTERACTION</b>               | <i>IL2RB</i>                           | <i>IL2RB, IL6ST, TNFSF11, PDGFB, IL10</i>                                                                | <i>IL2RB, VEGFAB, VEGFB, TNFRSF1B, IL6ST, TNFSF11</i>             |
|                                          | <b>TGF-BETA SIGNALING PATHWAY</b>                           | <i>SMURF2, THBS1</i>                   | <i>MAPK1, PPP2CA, SMURF2, SMAD1, SMURF1</i>                                                              | <i>MAPK1, PPP2CA, SMAD4</i>                                       |
| <b>IMMUNE SYSTEM</b>                     | <b>TOLL-LIKE RECEPTOR SIGNALING PATHWAY</b>                 | <i>PIK3R3, MAP2K7</i>                  | <i>MAPK1, PIK3R3, MAPK10, IRF5, MAP2K1, MAPK9, RAC1, IKBKB, IL10, MAP2K7</i>                             | <i>MAPK1, PIK3R3, MAPK10, IKBKE, IRF5</i>                         |
|                                          | <b>NOD-LIKE RECEPTOR SIGNALING PATHWAY</b>                  | <i>TP53</i>                            | <i>MAPK1, MAPK10, FN1, ITPR2, MAPK9, BCL2, TP53, IKBKB, IL10</i>                                         | <i>MAPK1, MAPK10, IKBKE</i>                                       |

**Table S3.** Target genes in *D. rerio*, regulated by at least two given miRNAs in over two analyzed pathways in human according to KEGG database (see Table 2). A particular attention was payed to genes, regulated by 3 miRNAs simultaneously (shown in underlined bold: *CACNA1C*, *CNTNAP2*, *IL2RB*, *MAP3K3*, *PIK3R3*, *PRKG1*, *UBE2R2*).

| <b>miR-125b</b>              | <b>miR-200b</b>              | <b>miR-223</b>               |
|------------------------------|------------------------------|------------------------------|
|                              | <i>ADCY7</i>                 | <i>ADCY7</i>                 |
|                              | <i>ADRB1</i>                 | <i>ADRB1</i>                 |
|                              | <i>ATP1B4</i>                | <i>ATP1B4</i>                |
| <u><b><i>CACNA1C</i></b></u> | <u><b><i>CACNA1C</i></b></u> | <u><b><i>CACNA1C</i></b></u> |
|                              | <i>CACNB1</i>                | <i>CACNB1</i>                |
| <i>CDK6</i>                  | <i>CDK6</i>                  |                              |
| <u><b><i>CNTNAP2</i></b></u> | <u><b><i>CNTNAP2</i></b></u> | <u><b><i>CNTNAP2</i></b></u> |
|                              | <i>COL4A1</i>                | <i>COL4A1</i>                |
|                              | <i>DAG1</i>                  | <i>DAG1</i>                  |
| <i>DYNC1LI2</i>              |                              | <i>DYNC1LI2</i>              |
|                              | <i>E2F1</i>                  | <i>E2F1</i>                  |
|                              | <i>ENOPH1</i>                | <i>ENOPH1</i>                |
| <i>FGFR2</i>                 | <i>FGFR2</i>                 |                              |
|                              | <i>IGFBP3</i>                | <i>IGFBP3</i>                |
| <u><b><i>IL2RB</i></b></u>   | <u><b><i>IL2RB</i></b></u>   | <u><b><i>IL2RB</i></b></u>   |
|                              | <i>IL6ST</i>                 | <i>IL6ST</i>                 |
|                              | <i>IPPK</i>                  | <i>IPPK</i>                  |
|                              | <i>IRF5</i>                  | <i>IRF5</i>                  |
| <i>IRS1</i>                  | <i>IRS1</i>                  |                              |
| <i>ITGA9</i>                 | <i>ITGA9</i>                 |                              |
| <i>KCNJ11</i>                | <i>KCNJ11</i>                |                              |
| <i>LDLR</i>                  |                              | <i>LDLR</i>                  |
| <i>MAP2K7</i>                | <i>MAP2K7</i>                |                              |
|                              | <i>MAP3K1</i>                | <i>MAP3K1</i>                |
| <u><b><i>MAP3K3</i></b></u>  | <u><b><i>MAP3K3</i></b></u>  | <u><b><i>MAP3K3</i></b></u>  |
|                              | <i>MAPK1</i>                 | <i>MAPK1</i>                 |
|                              | <i>MAPK10</i>                | <i>MAPK10</i>                |
| <i>NOTCH3</i>                |                              | <i>NOTCH3</i>                |
|                              | <i>PAK7</i>                  | <i>PAK7</i>                  |
|                              | <i>PDCD6IP</i>               | <i>PDCD6IP</i>               |
| <u><b><i>PIK3R3</i></b></u>  | <u><b><i>PIK3R3</i></b></u>  | <u><b><i>PIK3R3</i></b></u>  |
| <i>PLCG1</i>                 | <i>PLCG1</i>                 |                              |
|                              | <i>PPP2CA</i>                | <i>PPP2CA</i>                |
| <u><b><i>PRKG1</i></b></u>   | <u><b><i>PRKG1</i></b></u>   | <u><b><i>PRKG1</i></b></u>   |
| <i>RPS6KA4</i>               | <i>RPS6KA4</i>               |                              |
|                              | <i>SDC2</i>                  | <i>SDC2</i>                  |
| <i>SMURF2</i>                | <i>SMURF2</i>                |                              |
|                              | <i>TNFSF11</i>               | <i>TNFSF11</i>               |
| <i>TP53</i>                  | <i>TP53</i>                  |                              |
|                              | <i>UBE2J1</i>                | <i>UBE2J1</i>                |
| <u><b><i>UBE2R2</i></b></u>  | <u><b><i>UBE2R2</i></b></u>  | <u><b><i>UBE2R2</i></b></u>  |

**Table S4. Antibodies and reagents used.**

| <b>ANTIBODIES</b>                                                      |                     |             |                          |                  |
|------------------------------------------------------------------------|---------------------|-------------|--------------------------|------------------|
| <b>Antigene</b>                                                        | <b>Acronims</b>     | <b>Code</b> | <b>Company</b>           | <b>Citations</b> |
| Human, <i>D. rerio</i> Cystathionine $\beta$ -Synthase                 | anti-CBS            | ab96252     | Abcam                    |                  |
| Human, <i>D. rerio</i> Cystathionine $\gamma$ -Lyase                   | anti-CSE            | ab136604    | Abcam                    |                  |
| <i>D. rerio</i> Myosin, sarcomere (MHC)                                | MF20                | AB2147781   | DSHB                     | [17]             |
| <i>D. rerio</i> Myosin heavy chain, slow developmental (sd-MyHC/ Myh6) | S46                 | AB528376    | DSHB                     | [18]             |
| Human, Collagen Type I                                                 | Col-1A1             | sc-59772    | Santa Cruz Biotechnology |                  |
| Human, zebrafish, anti-alpha Tubulin                                   | $\alpha$ Tub        | ab15246     | Abcam                    |                  |
| Horseradish peroxidase conjugated anti-rabbit                          | anti-rabbit         | NC27606     | Immunoreagents           |                  |
| horseradish peroxidase conjugated anti-mouse                           | anti-mouse          | NC          | Immunoreagents           |                  |
| IgG Alexa Fluor <sup>®</sup> 488 conjugate                             | anti-mouse          | A-11001     | Thermo Fisher            |                  |
| IgG Alexa Fluor <sup>®</sup> 555 conjugate                             | anti-mouse          | A-21422     | Thermo Fisher            |                  |
| <b>REAGENTS</b>                                                        |                     |             |                          |                  |
| <b>Name of the reagent</b>                                             | <b>Abbreviation</b> | <b>Code</b> | <b>Producer</b>          |                  |
| Dulbecco's Modified Eagle's Medium                                     | DMEM                | L0106-500   | Microgem                 |                  |
| Fetal Bovine Serum                                                     | FBS                 | S1810-500   | Microgem                 |                  |
| L-Glutamine                                                            |                     | X0550-100   | Microgem                 |                  |
| Penicillin-Streptomycin Solution                                       | Pen-strep           | L0022-100   | Microgem                 |                  |
| L-Glutathione                                                          | GSH                 | G6013-5G    | Sigma                    |                  |
| DL-Cysteine                                                            | Cys                 | 30089-100G  | Sigma                    |                  |
| Pyridoxine hydrochloride                                               | B6                  | P6280-10G   | Sigma                    |                  |
| S-Adenosylmethionine                                                   | SAM                 | B9003S      | BioLabs                  |                  |
| DL-Lanthionine                                                         | Lan                 | L0010       | TCI                      |                  |
| RIPA buffer                                                            |                     | TCL131      | Himedia                  |                  |
| Protease Inhibitor Cocktail Tablets                                    | protease inhibitors | 11836153001 | Roche                    |                  |
| Trans-Blot <sup>®</sup> Turbo <sup>™</sup> Mini PVDF Transfer Packs    | PVDF membrane       | 1704156     | Bio-rad                  |                  |
| Immobilon Western Chemiluminescent HRP Substrate                       |                     | WBKLS0500   | Merck                    |                  |
| mirVana <sup>™</sup> PARIS <sup>™</sup> kit                            |                     | AM1556      | Thermo Fisher            |                  |
| QuantiTect <sup>®</sup> Reverse transcription kit                      |                     | 205313      | Qiagen                   |                  |
| Power SYBR <sup>™</sup> Green PCR Master Mix                           |                     | 4367659     | Thermo Fisher            |                  |
| RT-TaqMan <sup>®</sup> MicroRNA Assays                                 |                     |             | Applied Biosystems       |                  |
| Saponin                                                                |                     | 47036-50G   | Sigma-Aldrich            |                  |
| Sheep Serum                                                            |                     | S3772-5ML   | Sigma                    |                  |
| Bovine Serum Albumin                                                   | BSA                 | A2153-10G   | Sigma                    |                  |

**Table S5.** List of oligonucleotides used for qPCR experiments.

| <b>Primer Name</b> |         | <b>Sequence (5' → 3')</b> | <b>Source</b> | <b>ID</b>      |
|--------------------|---------|---------------------------|---------------|----------------|
| <i>Nrf2a</i>       | Forward | GAGCGGGAGAAATCACACAGAATG  | [43]          | NM_182889.1    |
|                    | Reverse | CAGGAGCTGCATGCACTCATCG    |               |                |
| <i>AKT</i>         | Forward | GCAAGATGTGGATCAGCTGGAG    | [44]          | NM_001281801.1 |
|                    | Reverse | CCACAGTCTGGATGGCTTGGT     |               |                |
| <i>CBSb</i>        | Forward | TTGACCAGTACCGCAATCCC      | [30]          | NM_001014345.2 |
|                    | Reverse | CCTGCGACCAGCATGTCTAT      |               |                |
| <i>CSE</i>         | Forward | CGTCTTTCAGTGGGTCTGGA      | [30]          | NM_212604.3    |
|                    | Reverse | CACTGCTGTTCTCATCCGT       |               |                |
| <i>GAPDH</i>       | Forward | GATACACGGAGCACCAGGTT      | [44]          | NM_001115114.1 |
|                    | Reverse | GCCATCAGGTCACATACACG      |               |                |

### Supplementary References

43. Rousseau, M.E.; Sant, K.E.; Borden, L.R.; Franks, D.G.; Hahn, M.E.; Timme-Laragy, A.R. Regulation of Ahr signaling by Nrf2 during development: Effects of Nrf2a deficiency on PCB126 embryotoxicity in zebrafish (*Danio rerio*). *Aquat. Toxicol.* 2015, 167, 157–171.
44. Li, L.; Huang, T.; Tian, C.; Xiao, Y.; Kou, S.; Zhou, X.; Liu, S.; Ye, X.; Li, X. The defensive effect of phellodendrine against AAPH-induced oxidative stress through regulating the AKT/NF- $\kappa$ B pathway in zebrafish embryos. *Life Sci.* 2016, 157, 97–106.
